# Supplementary material for: A highly selective and sensitive fluorescent chemosensor for distinguishing cadmium(ii) from zinc(ii) based on amide tautomerization
Source: Royal Society of Chemistry journal article supplement (doi:10.1039/c8nj03465f), 2018-01-01
Supplement: c8nj03465f1.pdf [file c8nj03465f1.pdf]

## Supporting information

A highly selective and sensitive fluorescent chemosensor for distinguishing cadmium(II) from zinc(II) based on amide tautomerization

Yuanyuan Zhang, Xiangzhu Chen, Jingjing Liu, Gui Gao, Xueyan Zhang, Shicong Hou\*, Hongmei Wang\*

Department of Applied Chemistry, China Agricultural University, Beijing, 100193, P.R. China.

\*Corresponding authors

E-mail addresses: houshc@cau.edu.cn (S. C. Hou); Fax number: +86-10-62731881.  
whmd@cau.edu.cn (H. M. Wang).

## Contents

1. Additional data
2.  $^1\text{H}$  NMR,  $^{13}\text{C}$  NMR and HRMS analyses

## 1. Additional data

| Reference | analyte          | Solvent (v:v)                                                               | $\lambda_{\text{ex}}/\lambda_{\text{em}}$ (nm) | Detection limit    |
|-----------|------------------|-----------------------------------------------------------------------------|------------------------------------------------|--------------------|
| Ref. [19] | $\text{Cd}^{2+}$ | DMSO:H <sub>2</sub> O=1:1                                                   | 341/473                                        | 0.3 $\mu\text{M}$  |
| Ref. [42] | $\text{Cd}^{2+}$ | 10 mM Tris-HCl buffer                                                       | 312/410                                        | 1.18 $\mu\text{M}$ |
| Ref. [43] | $\text{Cd}^{2+}$ | CH <sub>3</sub> OH: HEPES buffer =1:4                                       | 505/550                                        | 0.71 $\mu\text{M}$ |
| Ref. [44] | $\text{Cd}^{2+}$ | Tris-HCl (0.02 M) solution<br>(containing 0.1 mM sodium phosphate, pH =7.4) | 370/502                                        | 0.04 $\mu\text{M}$ |
| Ref. [48] | $\text{Cd}^{2+}$ | CH <sub>3</sub> CN: HEPES buffer =3:7                                       | 387/495                                        | 58.4 nM            |
| Ref. [57] | $\text{Cd}^{2+}$ | CH <sub>3</sub> CN                                                          | 341/455                                        | 2.81 ppb           |
| This work | $\text{Cd}^{2+}$ | EtOH:H <sub>2</sub> O=1:1                                                   | 360/506                                        | 0.24 nM            |

**Table S1.** A comparison table about the detection limits of **L2** and other probes for  $\text{Cd}^{2+}$ .

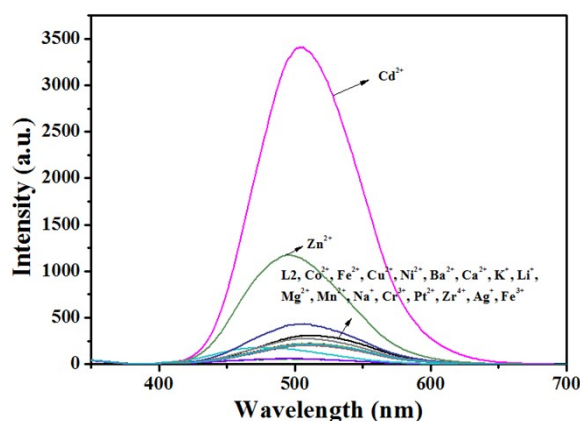

**Fig. S1** The fluorescent spectra of **L2** in the presence of various metal ions (1.0 equiv.) in EtOH-H<sub>2</sub>O (1/1, v/v) solution.

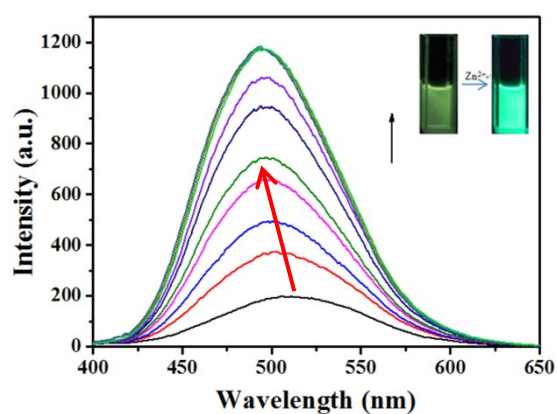

**Fig. S2** Fluorescence spectra changes of **L2** (10  $\mu\text{M}$ ) upon addition of  $\text{Zn}^{2+}$ ,  $\lambda_{\text{em}} = 490$

nm. Insert: The color change of L2 upon addition of Zn<sup>2+</sup> under 365 nm UV light.

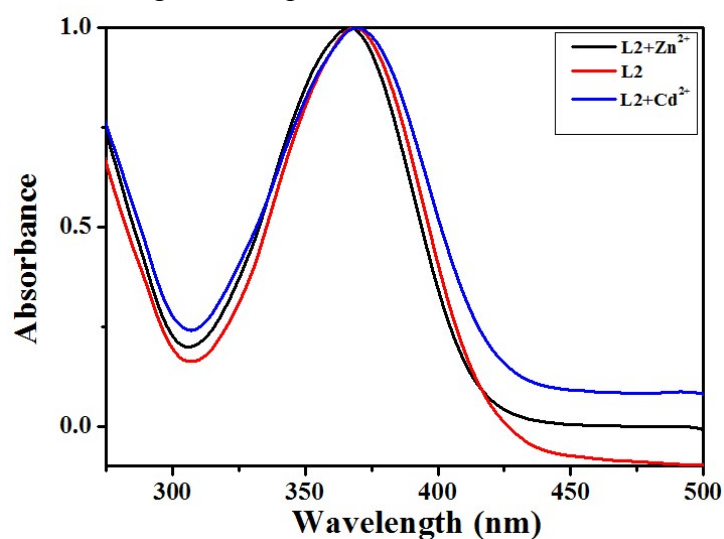

**Fig. S3** Absorption spectra of L2 (10 μM) before and after coordinated with 1.0 equiv. of Cd<sup>2+</sup> and 1.0 equiv. of Zn<sup>2+</sup>.

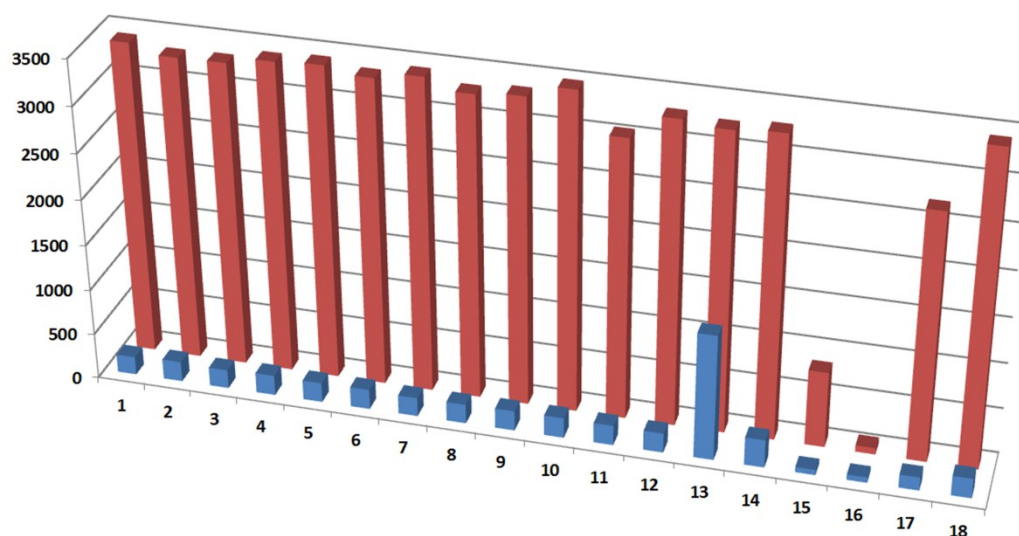

**Fig. S4** The fluorescent spectra of L2 (10 μM) at 506 nm in the presence of various metal ions (1.0 equiv.) (blue bars) and further addition of 1.0 equiv. of Cd<sup>2+</sup> (red bars). (1)L2; (2)Li<sup>+</sup>; (3)Mg<sup>2+</sup>; (4)Mn<sup>2+</sup>; (5)Na<sup>+</sup>; (6)K<sup>+</sup>; (7)Ca<sup>2+</sup>; (8)Ba<sup>2+</sup>; (9)Fe<sup>2+</sup>; (10)Fe<sup>3+</sup>; (11)Pt<sup>2+</sup>; (12)Zr<sup>4+</sup>; (13)Zn<sup>2+</sup>; (14)Ag<sup>+</sup>; (15)Co<sup>2+</sup>; (16)Cu<sup>2+</sup>; (17)Ni<sup>2+</sup>; (18)Cr<sup>3+</sup>.

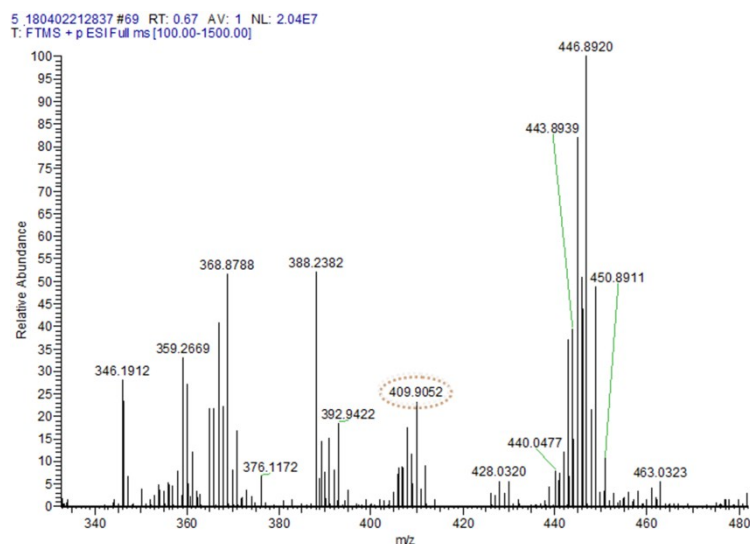

**Fig. S5** Isotopic distribution pattern for the molecular ion peak at  $m/z = 409.9052$  ( $z=2$ ) for  $[L2 + Cd^{2+} + Na^+ + ClO_4^-]^{2+}$  obtained from HRMS-ESI.

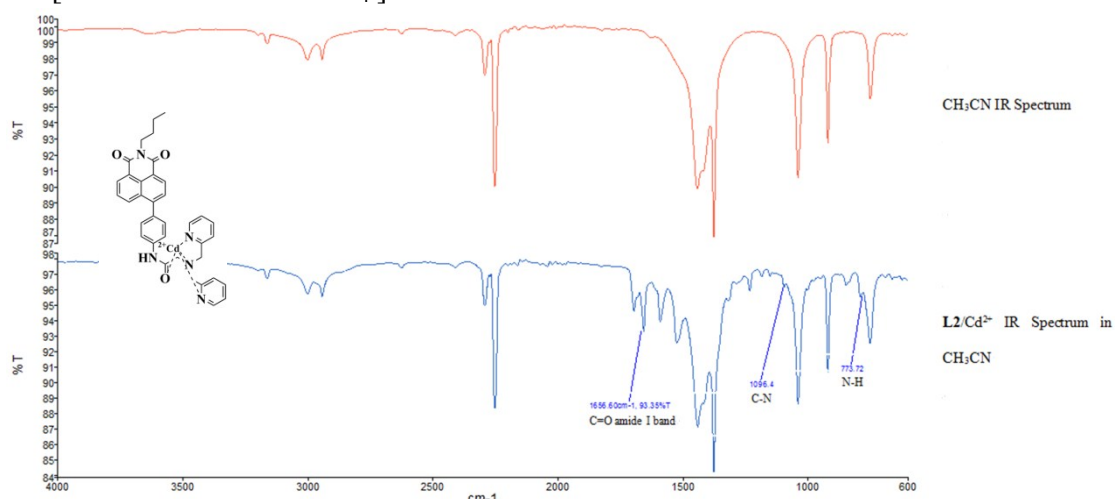

**Fig. S6** IR spectrum of  $L2/Cd^{2+}$  complex in  $CH_3CN$ .

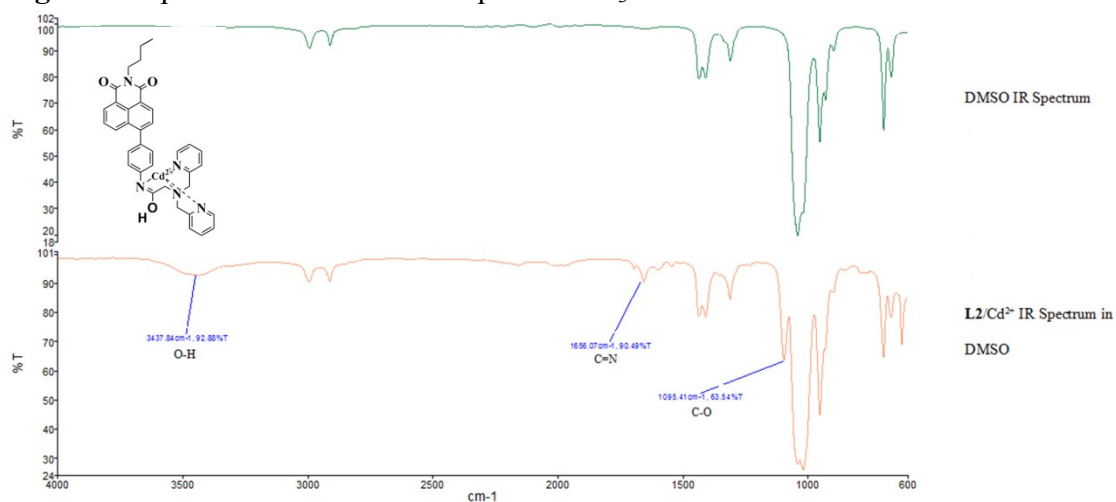

**Fig. S7** IR spectrum of  $L2/Cd^{2+}$  complex in DMSO.

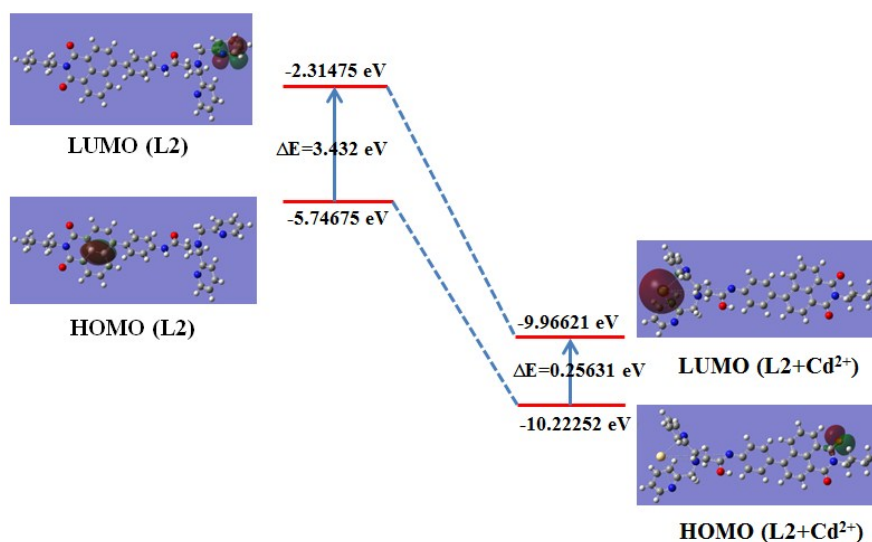

**Fig. S8** The HOMO and LUMO orbitals of **L2** and **L2/Cd<sup>2+</sup>** complex calculated at the DFT level.

| Center Number | Coordinates (Angstroms) |               |               |
|---------------|-------------------------|---------------|---------------|
|               | X                       | Y             | Z             |
| 1C            | 5.1868889155            | 2.7839572507  | 2.0385183961  |
| 2C            | 4.2392940577            | 1.787688718   | 2.3391175808  |
| 3C            | 3.2215493153            | 1.4959844331  | 1.452961495   |
| 4C            | 3.1022477901            | 2.1828214306  | 0.214346938   |
| 5C            | 4.0466044695            | 3.2225209645  | -0.0643995577 |
| 6C            | 5.0886342654            | 3.4986349106  | 0.8585552159  |
| 7C            | 2.0645304186            | 1.9144336694  | -0.7435895115 |
| 8C            | 1.9846138889            | 2.7069858262  | -1.8829617746 |
| 9C            | 2.9075916336            | 3.734365406   | -2.1397916856 |
| 10C           | 3.9372499712            | 3.987421909   | -1.2526044451 |
| 11C           | 4.9115685512            | 5.0621337191  | -1.5581402962 |
| 12N           | 5.9163635204            | 5.295175893   | -0.6067080896 |
| 13C           | 6.0857864092            | 4.5624660732  | 0.5768958995  |
| 14O           | 7.0172719155            | 4.8058102313  | 1.3341791453  |
| 15O           | 4.8567950526            | 5.7281004597  | -2.5847879693 |
| 16C           | 6.8934546376            | 6.3616240866  | -0.8942902946 |
| 17C           | 8.1069965589            | 5.8537967525  | -1.6795355609 |
| 18C           | 9.1147030069            | 6.9721063292  | -1.9710384539 |
| 19C           | 10.3358078389           | 6.4843117767  | -2.7562558634 |
| 20C           | 1.0783242665            | 0.8175492231  | -0.5618511217 |
| 21C           | 1.4788715082            | -0.5092240947 | -0.3297075292 |
| 22C           | 0.5429357593            | -1.5294873828 | -0.2166042147 |
| 23C           | -0.8304047906           | -1.2592795784 | -0.3269012277 |
| 24C           | -1.2486953064           | 0.0601735309  | -0.5594886704 |
| 25C           | -0.2977491956           | 1.0698292523  | -0.6781615106 |
| 26N           | -1.7207806002           | -2.3425332587 | -0.1993600037 |

---

|     |               |               |               |
|-----|---------------|---------------|---------------|
| 27C | -3.0969567097 | -2.3559468592 | -0.2858081856 |
| 28C | -3.7029941294 | -3.7739049442 | -0.1802210526 |
| 29O | -3.7839908145 | -1.3594292758 | -0.4611502606 |
| 30N | -5.1061085177 | -3.8320306804 | 0.1447113505  |
| 31C | -6.0239299108 | -3.393650982  | -0.9042214383 |
| 32C | -5.4252630129 | -3.381867293  | 1.4985354228  |
| 33C | -7.3972536043 | -4.0331269477 | -0.7776927248 |
| 34C | -5.0221124511 | -4.3996404789 | 2.5531326996  |
| 35N | -7.4458086038 | -5.3745994429 | -0.6984924883 |
| 36C | -8.647537903  | -5.9542639475 | -0.6224728814 |
| 37C | -9.8538452967 | -5.2503918454 | -0.6233433963 |
| 38C | -9.8007574333 | -3.861533101  | -0.7035851967 |
| 39C | -8.5528837509 | -3.2437070611 | -0.7797903946 |
| 40N | -4.5190816208 | -3.9092026866 | 3.6962830884  |
| 41C | -4.1972760364 | -4.7813652625 | 4.6614176953  |
| 42C | -4.347684193  | -6.1615652116 | 4.5392457925  |
| 43C | -4.8651675445 | -6.6633956597 | 3.3437686518  |
| 44C | -5.2086751896 | -5.7718085379 | 2.3318074168  |
| 45H | 5.9949909758  | 3.021222071   | 2.7217977016  |
| 46H | 4.305334772   | 1.2508426632  | 3.2802659364  |
| 47H | 2.4880391091  | 0.7403128322  | 1.7082647216  |
| 48H | 1.2056809666  | 2.5010039207  | -2.6101478455 |
| 49H | 2.8410203445  | 4.3330195995  | -3.0417933257 |
| 50H | 6.3649566261  | 7.1272788802  | -1.46369172   |
| 51H | 7.2063531447  | 6.7698959075  | 0.0675831285  |
| 52H | 8.5940037481  | 5.0573633299  | -1.1039907289 |
| 53H | 7.7605732341  | 5.4127311736  | -2.6220025128 |
| 54H | 8.6155009876  | 7.7736815163  | -2.5319409243 |
| 55H | 9.4439857465  | 7.4202012593  | -1.0238730591 |
| 56H | 11.0380427199 | 7.3013704363  | -2.9506832062 |
| 57H | 10.8750989061 | 5.7056493807  | -2.205300109  |
| 58H | 10.0410690239 | 6.0612745294  | -3.7231359935 |
| 59H | 2.5353034935  | -0.7495637306 | -0.2638492734 |
| 60H | 0.8806990966  | -2.549913743  | 0.0501959945  |
| 61H | -2.3042624985 | 0.2766580748  | -0.6373194978 |
| 62H | -0.6355914608 | 2.0880097352  | -0.8469437122 |
| 63H | -1.2820761803 | -3.2344231152 | -0.0154744122 |
| 64H | -3.5376353915 | -4.2731396549 | -1.1449478546 |
| 65H | -3.1427754951 | -4.3511737579 | 0.5682140325  |
| 66H | -6.1280141585 | -2.300800389  | -0.9527006218 |
| 67H | -5.5941179286 | -3.7113189332 | -1.8622312241 |
| 68H | -4.9750584446 | -2.4128469868 | 1.7563778633  |
| 69H | -6.5117806776 | -3.2455826954 | 1.5529993818  |
| 70H | -8.6497256491 | -7.0415191115 | -0.5612632928 |

---

|     |                |               |               |
|-----|----------------|---------------|---------------|
| 71H | -10.7992228158 | -5.7796461492 | -0.5608304265 |
| 72H | -10.7107276045 | -3.2684341774 | -0.7019129973 |
| 73H | -8.4690299707  | -2.162790619  | -0.8387531663 |
| 74H | -3.7931175546  | -4.3511091986 | 5.5764398649  |
| 75H | -4.0653785937  | -6.8197389461 | 5.3549618642  |
| 76H | -5.0001973893  | -7.7326727034 | 3.2052006401  |
| 77H | -5.6147682174  | -6.1009787121 | 1.3806557748  |

Table S2. XYZ Coordinates for Calculated Optimized Geometry of **L2** at DFT/B3LYP/6-31G (d,p).

| Center Number | Coordinates (Angstroms) |               |               |
|---------------|-------------------------|---------------|---------------|
|               | X                       | Y             | Z             |
| 1C            | 7.4188340901            | 2.3822645612  | -1.5928904893 |
| 2C            | 6.0904856886            | 2.6336775417  | -1.9569083631 |
| 3C            | 5.0848572994            | 1.7099340032  | -1.6764251531 |
| 4C            | 5.3676425159            | 0.5039395683  | -0.9939156082 |
| 5C            | 6.7381071737            | 0.22927446    | -0.6815937275 |
| 6C            | 7.7455846916            | 1.1804362716  | -0.9725745035 |
| 7C            | 4.375680795             | -0.4938121364 | -0.6712564846 |
| 8C            | 4.8145549607            | -1.7427749481 | -0.1747631808 |
| 9C            | 6.1513677418            | -1.9968727479 | 0.1102619985  |
| 10C           | 7.1140895872            | -1.0119728215 | -0.1217114811 |
| 11C           | 8.5386487522            | -1.3100912035 | 0.2212462669  |
| 12N           | 9.4837255325            | -0.3336974981 | -0.0793878402 |
| 13C           | 9.1764141354            | 0.9119215596  | -0.6341184878 |
| 14O           | 10.0368010604           | 1.7519022568  | -0.8401325912 |
| 15O           | 8.8407991548            | -2.3733204664 | 0.7415313585  |
| 16C           | 10.9028068125           | -0.6137043336 | 0.2575681847  |
| 17C           | 11.2672504677           | -0.1767807147 | 1.679892116   |
| 18C           | 12.7369107117           | -0.4762052185 | 2.0062268731  |
| 19C           | 13.1257387742           | -0.0467780633 | 3.4242433243  |
| 20C           | 2.9367474463            | -0.2600790722 | -0.776206063  |
| 21C           | 2.3432251976            | 0.9751751351  | -0.4003353854 |
| 22C           | 0.9789539137            | 1.1710977762  | -0.4832346027 |
| 23C           | 0.1279996074            | 0.1361819189  | -0.9414089463 |
| 24C           | 0.7094947711            | -1.1013268298 | -1.3234967538 |
| 25C           | 2.0748710387            | -1.2950721204 | -1.2231759477 |
| 26N           | -1.2200860884           | 0.3985605295  | -1.0846302704 |
| 27C           | -2.1941082263           | -0.3320264054 | -0.7008550254 |
| 28C           | -3.612219025            | -0.0491322675 | -1.1948386344 |
| 29O           | -2.132715028            | -1.3888397823 | 0.1334678641  |
| 30N           | -4.6918854843           | -0.3318016644 | -0.2675383071 |
| 31C           | -4.7667183255           | 0.5304116074  | 0.9037272998  |
| 32C           | -5.1180825657           | -1.7113081341 | -0.0924320703 |

---

|     |                |               |               |
|-----|----------------|---------------|---------------|
| 33C | -5.8090118643  | 1.6425165727  | 0.8008040164  |
| 34C | -6.6048309614  | -1.948538124  | -0.3372645209 |
| 35N | -5.9212024374  | 2.2632582293  | -0.3844348626 |
| 36C | -6.7399350394  | 3.3193869699  | -0.4771023366 |
| 37C | -7.4941416284  | 3.8199168602  | 0.5953493467  |
| 38C | -7.4093067013  | 3.1681426431  | 1.8198838383  |
| 39C | -6.5678500219  | 2.0408715533  | 1.9279932036  |
| 40N | -7.1250114255  | -3.0367556942 | 0.2519186859  |
| 41C | -8.3779731352  | -3.3980451056 | -0.0561402941 |
| 42C | -9.1901518471  | -2.6974266425 | -0.9593656403 |
| 43C | -8.6785688903  | -1.5388985003 | -1.5389595073 |
| 44C | -7.3649708261  | -1.1321568201 | -1.2097622938 |
| 45H | 8.2117345833   | 3.091463806   | -1.8040397903 |
| 46H | 5.8411280395   | 3.5516268814  | -2.4790274052 |
| 47H | 4.0782487677   | 1.9098774526  | -2.024076453  |
| 48H | 4.0769068539   | -2.5010145693 | 0.0645469324  |
| 49H | 6.4704713535   | -2.9420699804 | 0.535557869   |
| 50H | 11.0440631407  | -1.688103902  | 0.1331622235  |
| 51H | 11.5063996372  | -0.0818953601 | -0.478621254  |
| 52H | 11.076567617   | 0.8983390776  | 1.7846328631  |
| 53H | 10.6166350477  | -0.6965388979 | 2.3939853948  |
| 54H | 12.9239790465  | -1.5510354368 | 1.883417046   |
| 55H | 13.3810135967  | 0.0340072865  | 1.2782036707  |
| 56H | 14.1763972104  | -0.2718515043 | 3.6287388391  |
| 57H | 12.9826131308  | 1.0300084665  | 3.5664149343  |
| 58H | 12.5218341561  | -0.5663951308 | 4.1763125856  |
| 59H | 2.9668905158   | 1.7655048129  | 0.002091958   |
| 60H | 0.535049687    | 2.1149319468  | -0.1857173236 |
| 61H | 0.0817148898   | -1.8852279194 | -1.7366857936 |
| 62H | 2.4980554556   | -2.239659624  | -1.5488041438 |
| 63H | -3.6497049733  | 0.9982412434  | -1.5008154467 |
| 64H | -3.7598318889  | -0.6446643807 | -2.1038503251 |
| 65H | -3.7994737794  | 1.023956736   | 1.0790451794  |
| 66H | -4.5818118727  | -2.346629639  | -0.8066368905 |
| 67H | -4.8681631381  | -2.1176961665 | 0.8963271536  |
| 68H | -6.7881382486  | 3.8006558614  | -1.4512902626 |
| 69H | -8.1204879311  | 4.695494692   | 0.4631508622  |
| 70H | -7.9707165965  | 3.5168937216  | 2.6814598009  |
| 71H | -6.4123851359  | 1.5588048295  | 2.8908734882  |
| 72H | -8.7492651903  | -4.2941779619 | 0.4355429377  |
| 73H | -10.1876186817 | -3.0535238039 | -1.1929218743 |
| 74H | -9.2668191759  | -0.9631996221 | -2.2482431513 |
| 75H | -6.8909061845  | -0.2797424445 | -1.6894971873 |
| 76H | -1.2184418243  | -1.54389055   | 0.424047049   |

---



|      |               |               |              |
|------|---------------|---------------|--------------|
| 77H  | -4.9542825339 | -0.0659385627 | 1.8052100482 |
| 78Cd | -8.2738479729 | 0.150465939   | 0.9251714614 |

Table S3. XYZ Coordinates for Calculated Optimized Geometry of **L2**/Cd<sup>2+</sup> complex at DFT/B3LYP/GEN.

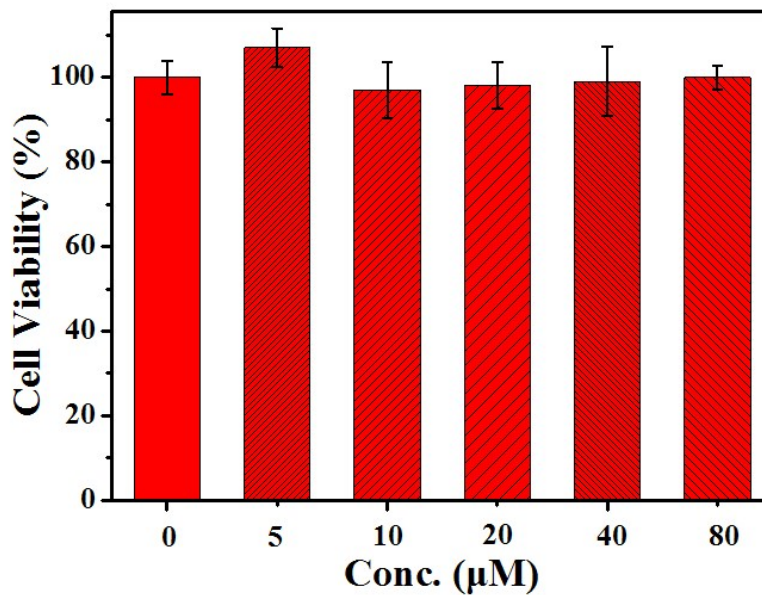

**Fig. S9** Cytotoxicity of **L2** at different concentrations for HeLa cells.

## 2. $^1\text{H}$ NMR, $^{13}\text{C}$ NMR and HRMS analyses

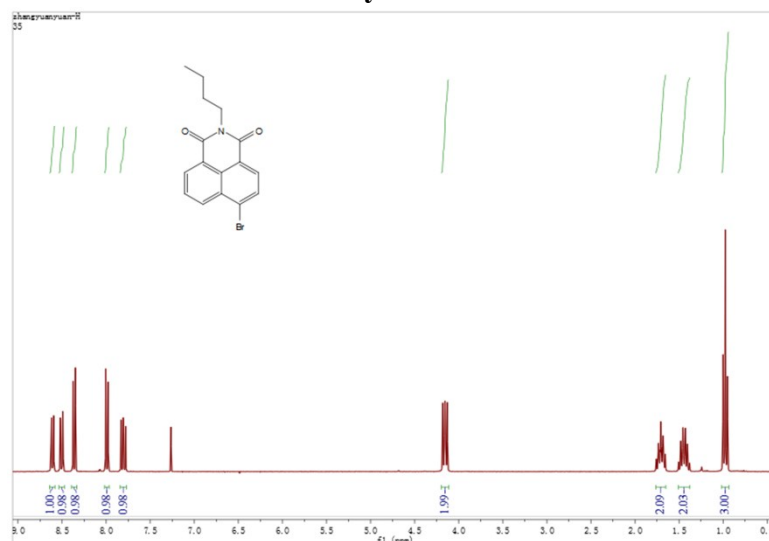

Fig. S10  $^1\text{H}$  NMR spectrum of **1** in  $\text{CDCl}_3$ .

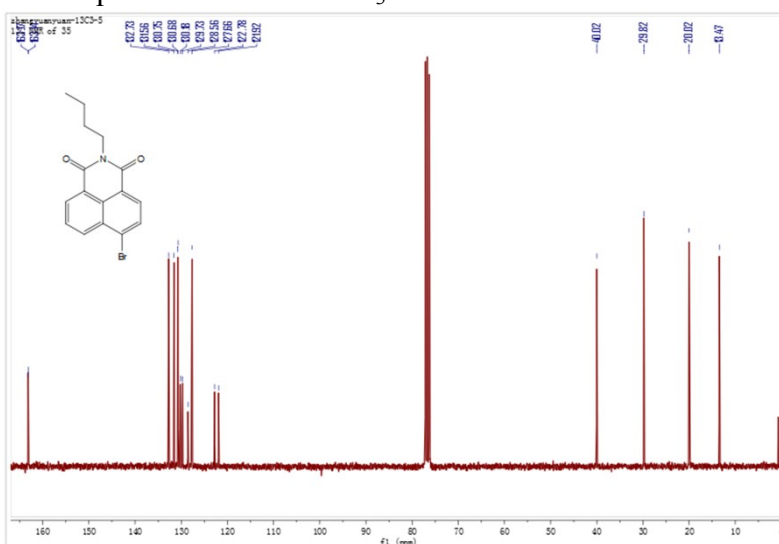

Fig. S11  $^{13}\text{C}$  NMR spectrum of **1** in  $\text{CDCl}_3$ .

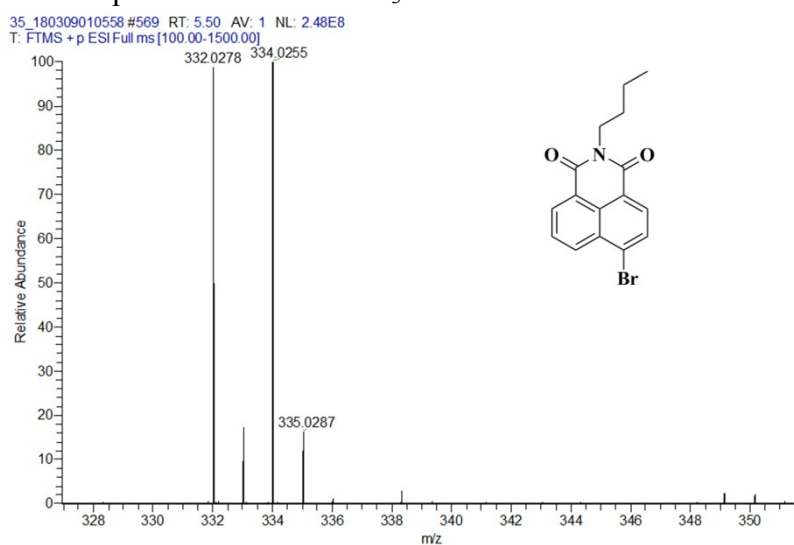

Fig. S12 High resolution mass spectra of **1**.

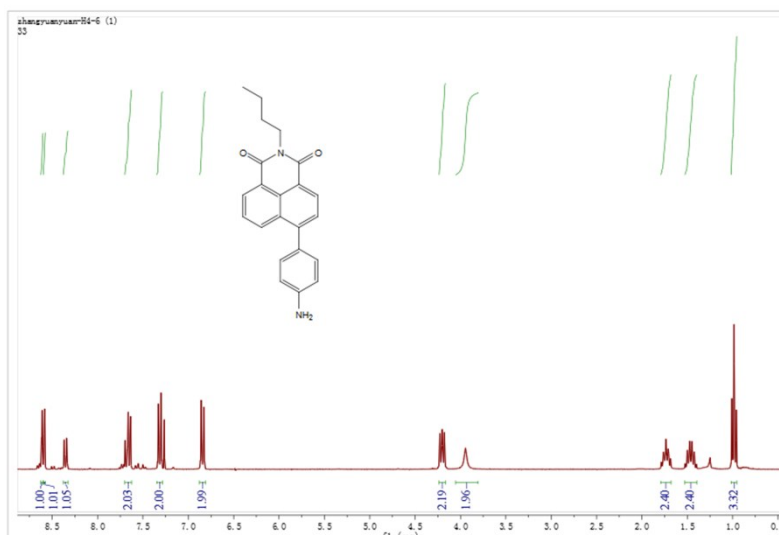

Fig. S13 <sup>1</sup>H NMR spectrum of 3 in CDCl<sub>3</sub>.

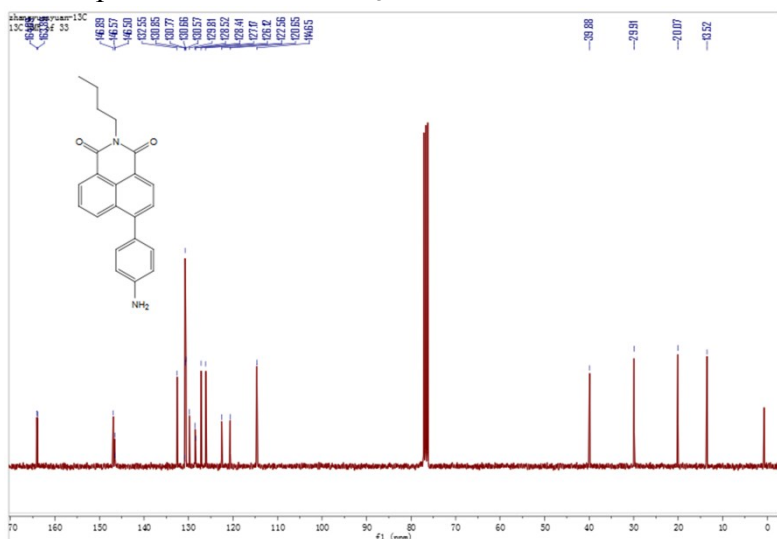

Fig. S14 <sup>13</sup>C NMR spectrum of 3 in CDCl<sub>3</sub>.

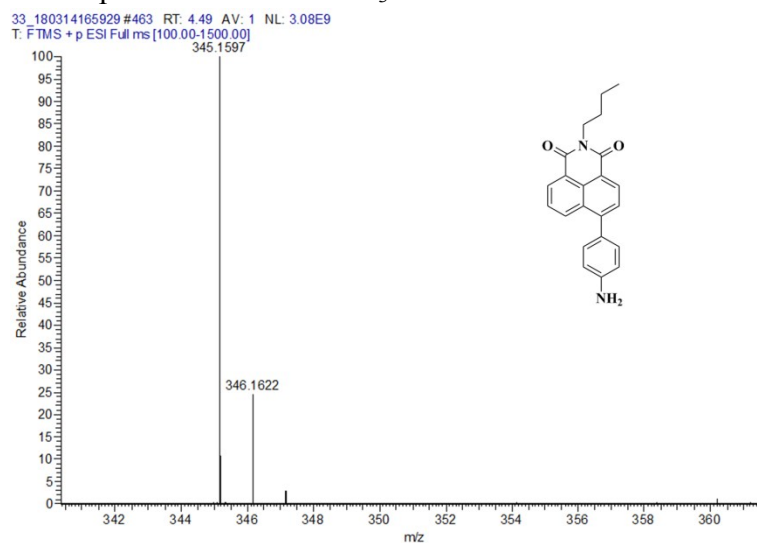

Fig. S15 High resolution mass spectra of 3.

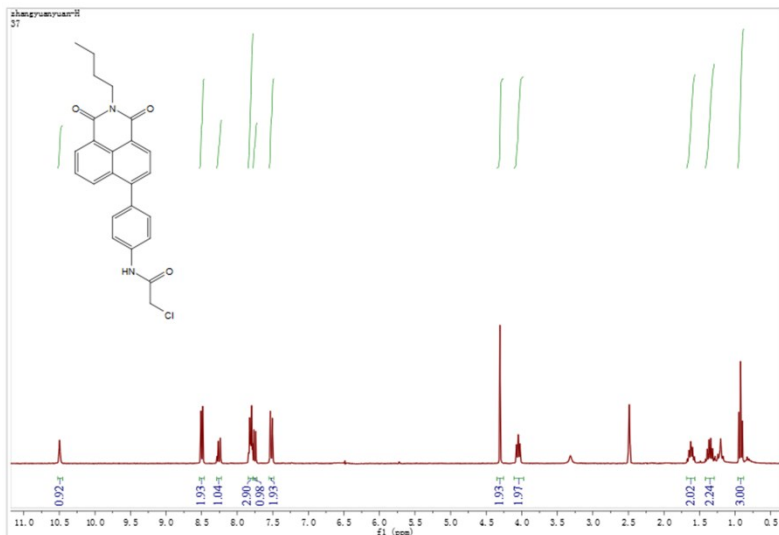

Fig. S16  $^1\text{H}$  NMR spectrum of 4 in DMSO-d<sub>6</sub>.

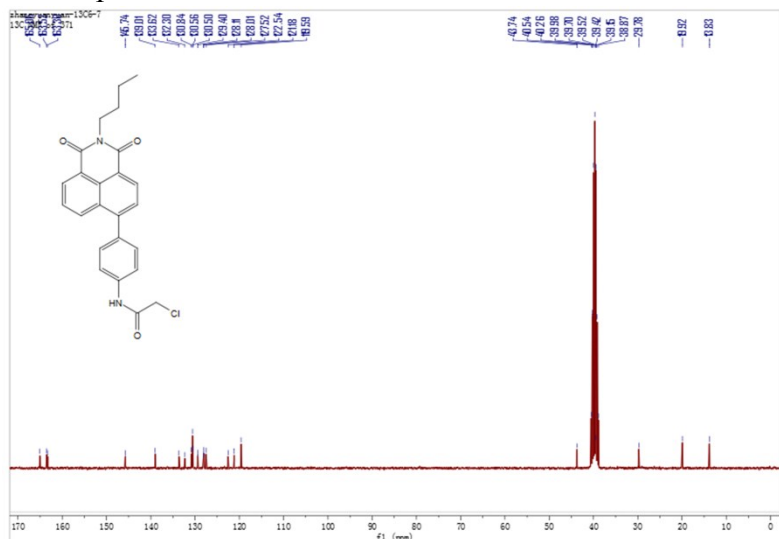

Fig. S17  $^{13}\text{C}$  NMR spectrum of 4 in DMSO-d<sub>6</sub>.

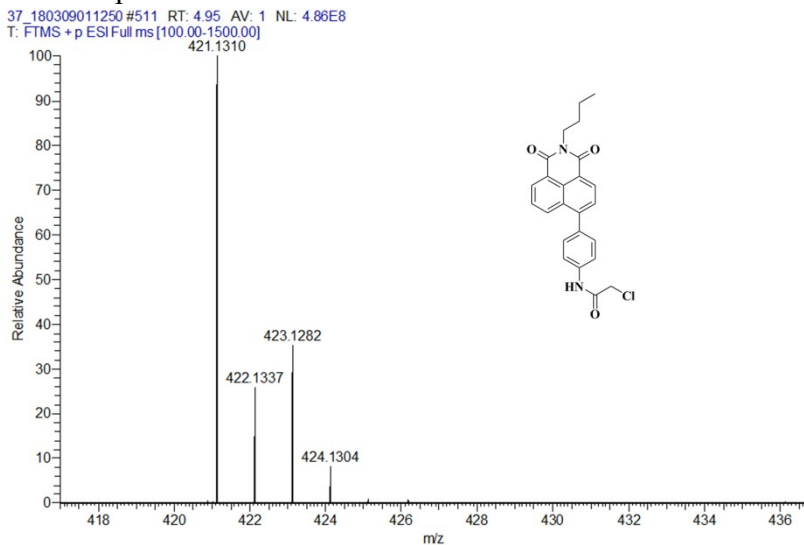

Fig. S18 High resolution mass spectra of 4.

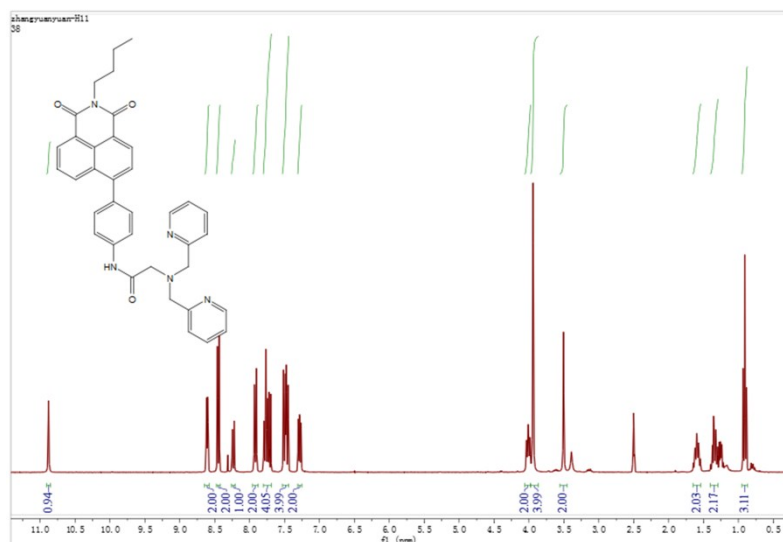

**Fig. S19** <sup>1</sup>H NMR spectrum of L2 in DMSO-d<sub>6</sub>.

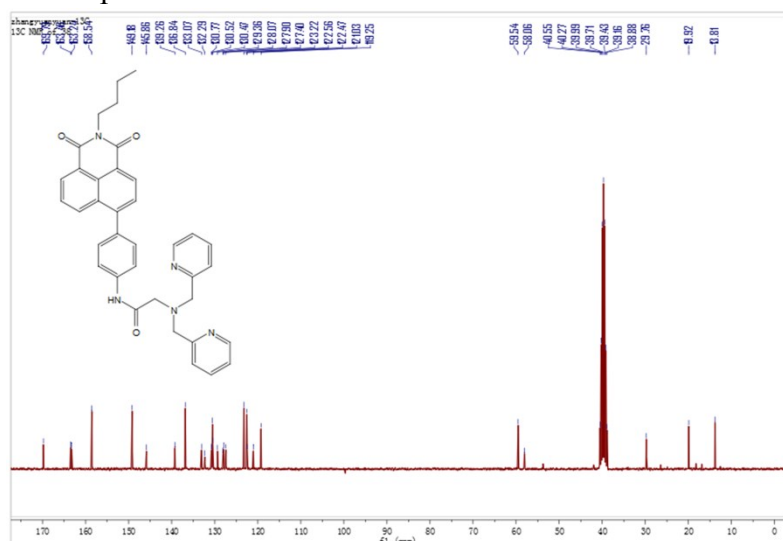

**Fig. S20** <sup>13</sup>C NMR spectrum of L2 in DMSO-d<sub>6</sub>.

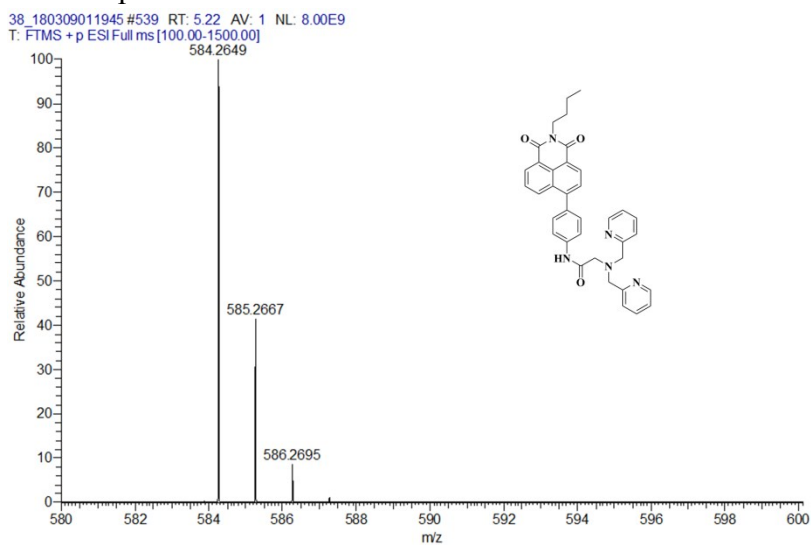

**Fig. S21** High resolution mass spectra of L2.
